# Supplementary material
Source: MDPI journal article supplement (https://www.mdpi.com/search?q=molecules-24-00843)
Supplement: s001 [file molecules-24-00843-s001.pdf]

## Supplementary information

**Multi-steps fragmentation-ion trap mass spectrometry coupled to liquid chromatography diode array system for investigation of olaparib related substances**

**Alaa Khedr<sup>1</sup>. Soad S. Abd El-Hay<sup>2</sup>. Ahmed K. Kammouna<sup>1</sup>**

<sup>1</sup> Department of Pharmaceutical Chemistry, Faculty of Pharmacy, King Abdulaziz University, Jeddah 21589, P.O. Box 80260, Saudi Arabia

<sup>2</sup> Department of Analytical Chemistry, Faculty of Pharmacy, Zagazig University, Egypt

IT-MS spectra of OLA and OLA-related substances, +MS<sup>2,3</sup> and -MS<sup>2,3</sup>

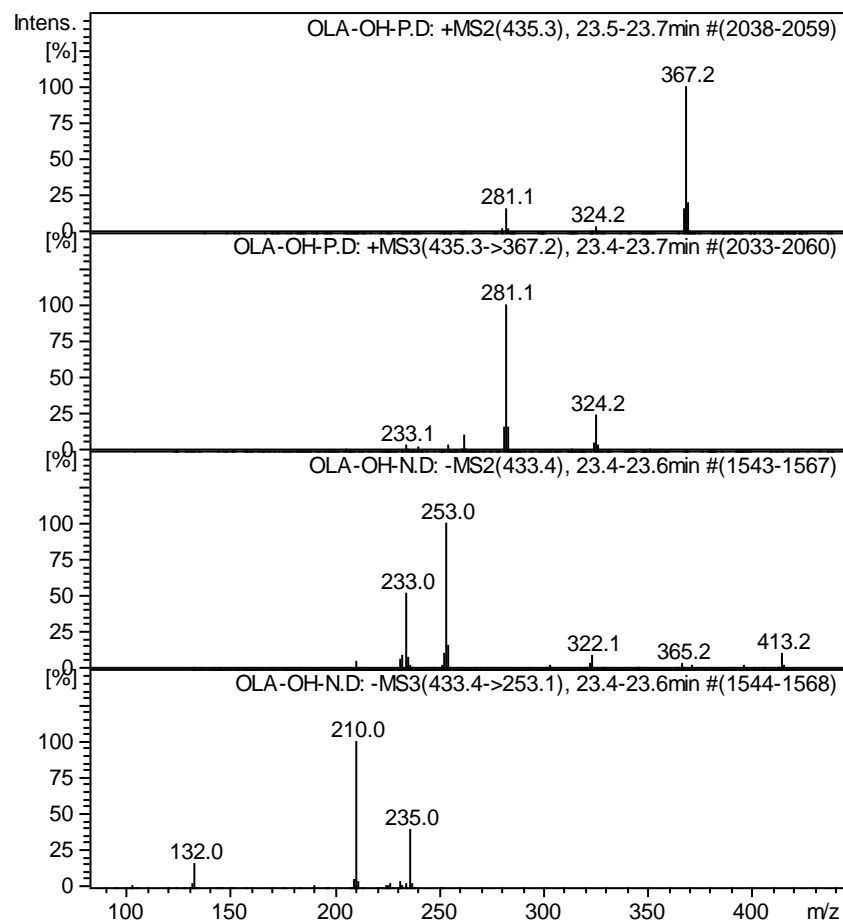

Figure S1: Average negative and positive IT-MS<sup>2,3</sup> spectra of  $m/z$  +435, +435 $\rightarrow$ +367 and -433, -433 $\rightarrow$ 253

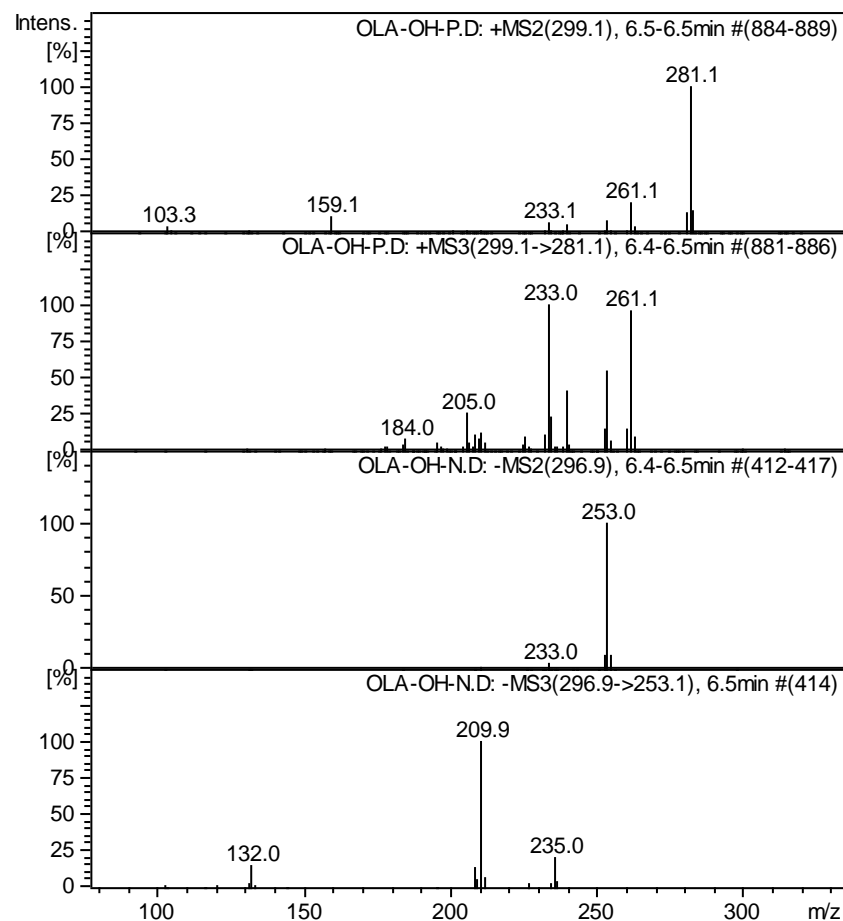

Figure S2: Average negative and positive IT-MS<sup>2,3</sup> spectra of  $m/z$  +299, +299 $\rightarrow$ +281 and -297, -297 $\rightarrow$ 253

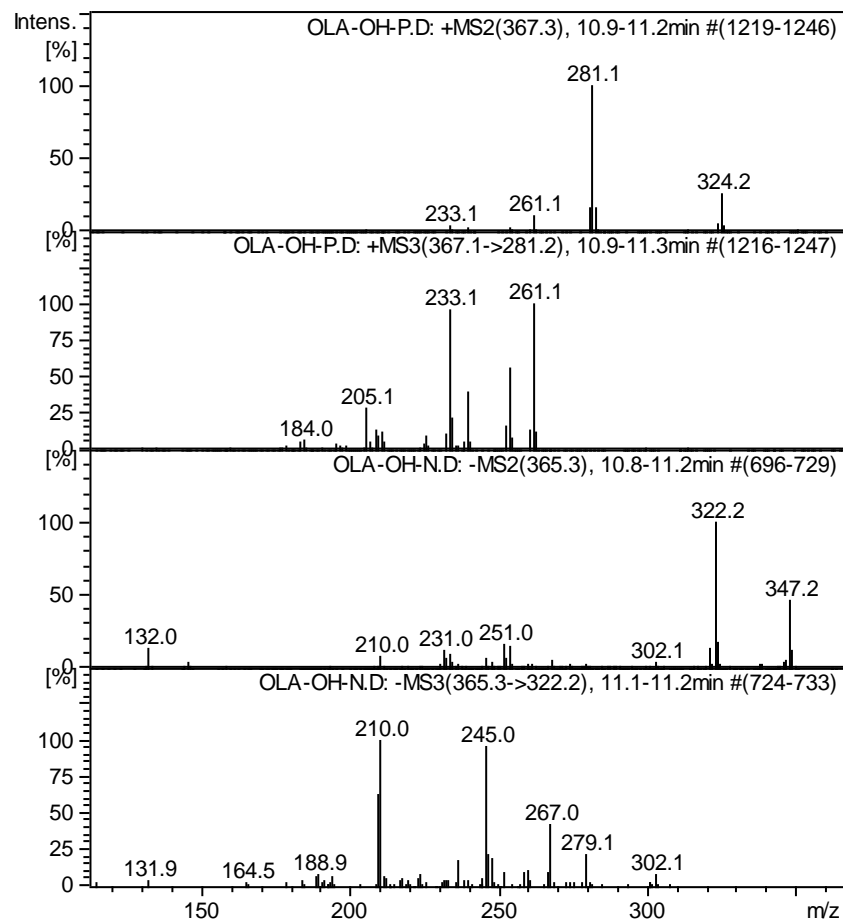

Figure S3: Average negative and positive IT-MS<sup>2,3</sup> spectra of  $m/z$  +367, +367 $\rightarrow$ +281 and -365, -365 $\rightarrow$ 322.

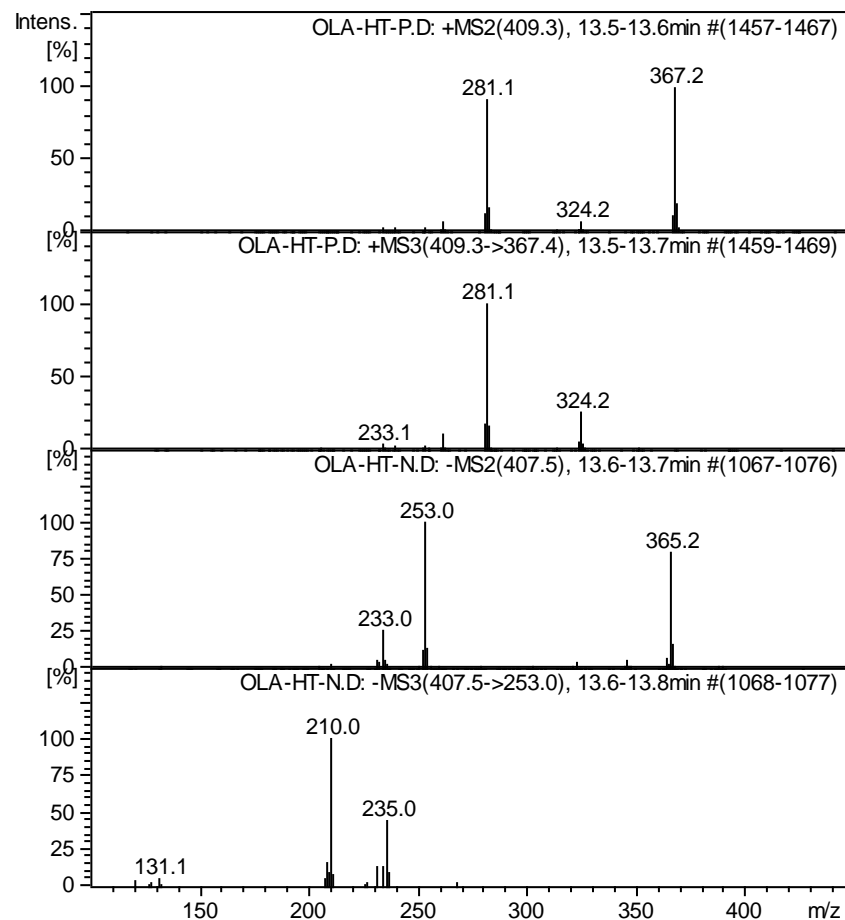

Figure S4: Average negative and positive IT-MS<sup>2,3</sup> spectra of  $m/z$  +409, +409 $\rightarrow$ +367 and -407, -407 $\rightarrow$ 253.

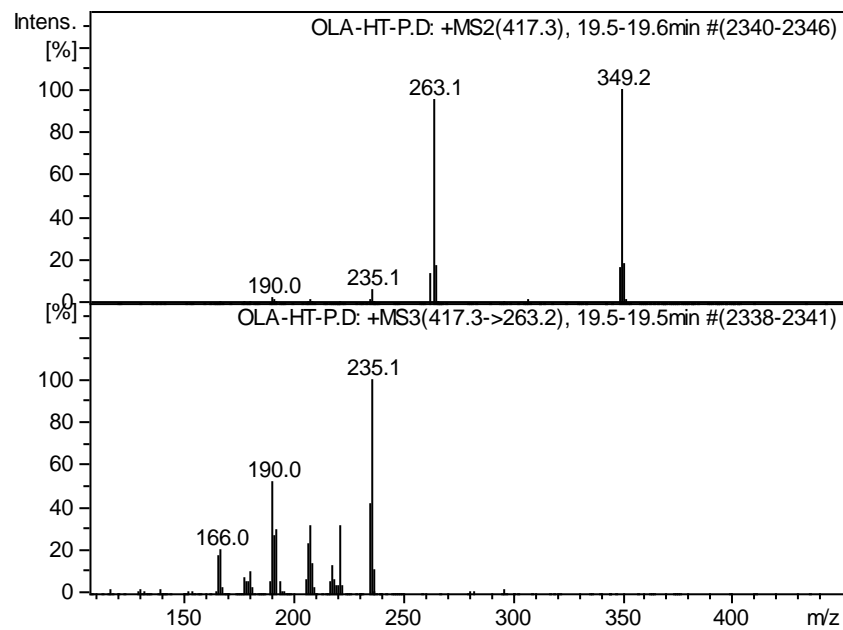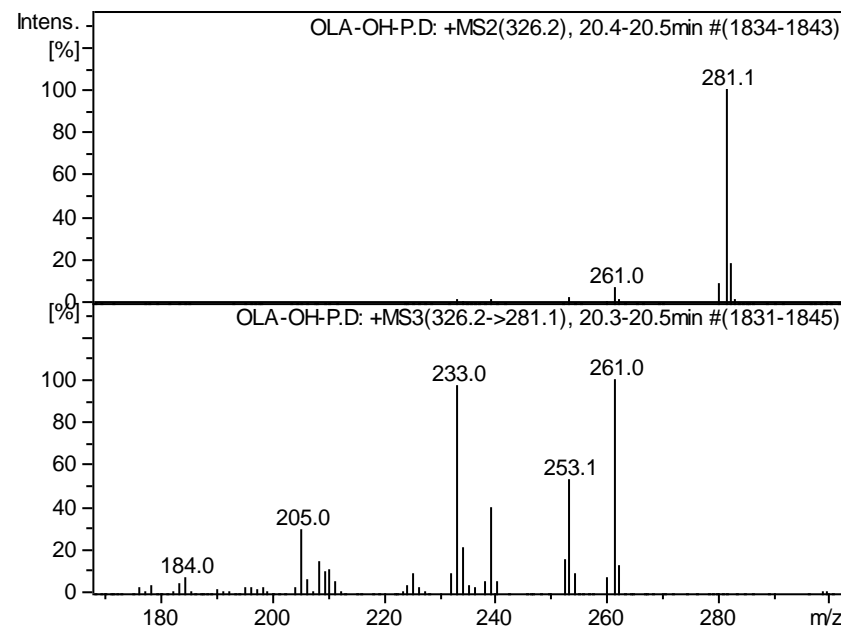

Figure S5: Average positive IT-MS<sup>2,3</sup> spectra of  $m/z$  +417, +417→+263. Figure S6: Average positive IT-MS<sup>2,3</sup> spectra of  $m/z$  +326, +326→+281.
